# Supplementary material for: Insecticide Susceptibility and Detoxification Enzyme Activity of Frankliniella occidentalis under Three Habitat Conditions
Source: MDPI journal article supplement (doi:10.3390/insects14070643), 2023-07-17
Supplement: s1 [file s1]

## Supplementary material

**Table S1.** Susceptibility of field populations and a laboratory population of *F. occidentalis* to spinetoram

| Month | Population <sup>a</sup> | Concentration-<br>response<br>regression<br>equation | LC <sub>50</sub><br>(mg·L <sup>-1</sup> ) | 95% CI<br>(mg·L <sup>-1</sup> ) | Correlation<br>coefficient | χ <sup>2</sup> | RR <sup>b</sup> |
|-------|-------------------------|------------------------------------------------------|-------------------------------------------|---------------------------------|----------------------------|----------------|-----------------|
| 4     | FA                      | y=1.771x+6.591                                       | 0.126                                     | 0.087~0.176                     | 0.9980                     | 0.2724         | 6.63            |
|       | OF                      | y=2.435x+8.353                                       | 0.042                                     | 0.026~0.054                     | 0.9943                     | 0.2531         | 2.21            |
|       | AI                      | y=3.310x+9.528                                       | 0.043                                     | 0.036~0.051                     | 0.9906                     | 0.9501         | 2.26            |
|       | SS                      | y=3.570x+11.185                                      | 0.019                                     | 0.015~0.022                     | 0.9901                     | 1.0011         | 1.00            |
| 5     | FA                      | y=2.243x+7.003                                       | 0.128                                     | 0.099~0.171                     | 0.9827                     | 1.2478         | 7.11            |
|       | OF                      | y=3.235x+9.074                                       | 0.055                                     | 0.044~0.065                     | 0.9867                     | 1.2021         | 3.06            |
|       | AI                      | y=3.668x+9.753                                       | 0.051                                     | 0.043~0.060                     | 0.9897                     | 1.1390         | 2.83            |
|       | SS                      | y=3.051x+10.310                                      | 0.018                                     | 0.015~0.022                     | 0.9973                     | 0.2216         | 1.00            |
| 6     | FA                      | y=2.713x+7.372                                       | 0.134                                     | 0.107~0.167                     | 0.9798                     | 1.2778         | 7.88            |
|       | OF                      | y=3.066x+8.667                                       | 0.064                                     | 0.051~0.076                     | 1.0000                     | 0.0025         | 3.76            |
|       | AI                      | y=3.830x+9.729                                       | 0.058                                     | 0.049~0.069                     | 0.9905                     | 1.0829         | 3.41            |
|       | SS                      | y=3.525x+11.272                                      | 0.017                                     | 0.014~0.020                     | 0.9904                     | 1.0589         | 1.00            |
| 7     | FA                      | y=2.649x+7.271                                       | 0.139                                     | 0.110~0.174                     | 0.9850                     | 1.5669         | 8.18            |
|       | OF                      | y=2.816x+3.454                                       | 0.059                                     | 0.046~0.072                     | 0.9884                     | 0.8437         | 3.47            |
|       | AI                      | y=3.543x+9.425                                       | 0.056                                     | 0.048~0.066                     | 0.9979                     | 0.2336         | 3.29            |
|       | SS                      | y=2.837x+9.994                                       | 0.017                                     | 0.014~0.021                     | 0.9997                     | 0.0219         | 1.00            |
| 8     | FA                      | y=2.378x+7.001                                       | 0.144                                     | 0.110~0.185                     | 0.9923                     | 0.8475         | 8.47            |
|       | OF                      | y=2.690x+7.843                                       | 0.088                                     | 0.070~0.111                     | 0.9956                     | 0.2768         | 5.18            |
|       | AI                      | y=3.214x+8.942                                       | 0.059                                     | 0.050~0.071                     | 0.9991                     | 0.0877         | 3.47            |
|       | SS                      | y=3.020x+10.364                                      | 0.017                                     | 0.014~0.020                     | 0.9951                     | 0.4189         | 1.00            |
| 9     | FA                      | y=2.644x+7.131                                       | 0.156                                     | 0.124~0.196                     | 0.9927                     | 0.7445         | 9.18            |
|       | OF                      | y=3.003x+8.158                                       | 0.089                                     | 0.073~0.109                     | 0.9971                     | 0.2083         | 5.24            |
|       | AI                      | y=3.642x+8.451                                       | 0.060                                     | 0.051~0.071                     | 0.9999                     | 0.0072         | 3.53            |
|       | SS                      | y=2.958x+10.226                                      | 0.017                                     | 0.014~0.021                     | 0.9881                     | 0.9543         | 1.00            |
| 10    | FA                      | y=3.856x+8.356                                       | 0.135                                     | 0.114~0.158                     | 0.9938                     | 0.7402         | 7.11            |
|       | OF                      | y=3.070x+8.351                                       | 0.081                                     | 0.067~0.098                     | 0.9945                     | 0.4849         | 4.26            |
|       | AI                      | y=3.661x+8.505                                       | 0.059                                     | 0.050~0.069                     | 0.9955                     | 0.4995         | 3.11            |
|       | SS                      | y=3.897x+11.746                                      | 0.019                                     | 0.014~0.021                     | 0.9863                     | 1.7063         | 1.00            |
| 11    | FA                      | y=3.216x+7.883                                       | 0.127                                     | 0.107~0.153                     | 0.9846                     | 1.4678         | 7.47            |
|       | OF                      | y=3.278x+8.786                                       | 0.070                                     | 0.058~0.083                     | 0.9987                     | 0.1271         | 4.12            |
|       | AI                      | y=3.693x+8.628                                       | 0.056                                     | 0.047~0.066                     | 0.9940                     | 0.6752         | 3.29            |
|       | SS                      | y=3.427x+11.062                                      | 0.017                                     | 0.014~0.020                     | 0.9977                     | 0.2250         | 1.00            |

Note: <sup>a</sup> See Table 1 for population codes; <sup>b</sup> The resistance ratio (RR), calculated by LC<sub>50</sub> of field population/LC<sub>50</sub> of susceptible strain (SS). The same below.

**Table S2.** Susceptibility of field populations and a laboratory population of *F. occidentalis* to spinosad

| Month | Population | Concentration-<br>response<br>regression<br>equation | LC <sub>50</sub><br>(mg·L <sup>-1</sup> ) | 95% CI<br>(mg·L <sup>-1</sup> ) | Correlation<br>coefficient | χ <sup>2</sup> | RR   |
|-------|------------|------------------------------------------------------|-------------------------------------------|---------------------------------|----------------------------|----------------|------|
| 4     | FA         | y=1.977x+5.076                                       | 0.915                                     | 0.658~1.217                     | 0.9836                     | 1.4704         | 2.47 |
|       | OF         | y=2.061x+5.261                                       | 0.747                                     | 0.557~0.979                     | 0.9965                     | 0.3408         | 2.02 |
|       | AI         | y=4.201x+6.179                                       | 0.524                                     | 0.440~0.597                     | 0.9831                     | 1.1929         | 1.42 |
|       | SS         | y=2.299x+5.994                                       | 0.370                                     | 0.278~0.472                     | 0.9959                     | 0.1937         | 1.00 |
| 5     | FA         | y=1.727x+5.104                                       | 0.871                                     | 0.597~1.187                     | 0.9966                     | 0.2292         | 2.45 |
|       | OF         | y=2.494x+5.305                                       | 0.754                                     | 0.590~0.955                     | 0.9953                     | 0.6204         | 2.12 |
|       | AI         | y=3.356x+5.887                                       | 0.544                                     | 0.456~0.654                     | 0.9863                     | 1.2742         | 1.53 |
|       | SS         | y=2.757x+6.236                                       | 0.356                                     | 0.283~0.435                     | 0.9946                     | 0.3670         | 1.00 |
| 6     | FA         | y=2.322x+5.293                                       | 0.748                                     | 0.566~0.962                     | 0.9954                     | 0.5057         | 2.47 |
|       | OF         | y=2.186x+5.481                                       | 0.602                                     | 0.445~0.779                     | 0.9976                     | 0.2439         | 1.99 |
|       | AI         | y=4.073x+6.002                                       | 0.568                                     | 0.484~0.660                     | 0.9903                     | 1.2721         | 1.87 |
|       | SS         | y=3.994x+7.073                                       | 0.303                                     | 0.256~0.351                     | 0.9862                     | 1.6483         | 1.00 |
| 7     | FA         | y=1.760x-5.111                                       | 1.156                                     | 0.840~1.659                     | 0.9960                     | 0.2764         | 3.04 |
|       | OF         | y=1.803x+5.351                                       | 0.639                                     | 0.438~0.867                     | 0.9942                     | 0.4261         | 1.68 |
|       | AI         | y=3.702x+5.875                                       | 0.580                                     | 0.495~0.680                     | 0.9844                     | 1.9193         | 1.53 |
|       | SS         | y=3.081x+6.294                                       | 0.380                                     | 0.315~0.457                     | 0.9877                     | 1.1052         | 1.00 |
| 8     | FA         | y=1.933x-5.151                                       | 1.197                                     | 0.877~1.686                     | 0.9954                     | 0.3217         | 2.93 |
|       | OF         | y=1.781x+5.143                                       | 0.832                                     | 0.582~1.151                     | 0.9995                     | 0.0326         | 2.04 |
|       | AI         | y=3.070x+5.698                                       | 0.593                                     | 0.492~0.713                     | 0.9945                     | 0.4849         | 1.45 |
|       | SS         | y=3.161x+6.232                                       | 0.408                                     | 0.337~0.491                     | 0.9996                     | 0.0319         | 1.00 |
| 9     | FA         | y=1.771x-5.225                                       | 1.339                                     | 0.964~1.996                     | 0.9988                     | 0.0743         | 3.81 |
|       | OF         | y=1.891x+5.053                                       | 0.937                                     | 0.675~1.291                     | 0.9827                     | 1.2980         | 2.67 |
|       | AI         | y=3.483x+5.776                                       | 0.599                                     | 0.502~0.710                     | 0.9983                     | 0.1735         | 1.71 |
|       | SS         | y=3.063x+6.392                                       | 0.351                                     | 0.285~0.422                     | 1.0000                     | 0.0001         | 1.00 |
| 10    | FA         | y=3.422x-5.333                                       | 0.799                                     | 0.632~0.984                     | 0.9963                     | 0.5600         | 2.09 |
|       | OF         | y=1.768x+5.434                                       | 0.568                                     | 0.412~0.781                     | 0.9800                     | 1.5456         | 1.48 |
|       | AI         | y=3.686x+5.882                                       | 0.576                                     | 0.487~0.678                     | 0.9861                     | 1.5858         | 1.50 |
|       | SS         | y=3.775x+6.574                                       | 0.383                                     | 0.321~0.450                     | 0.9999                     | 0.0142         | 1.00 |
| 11    | FA         | y=1.752x+5.371                                       | 0.614                                     | 0.419~0.834                     | 0.9998                     | 0.0214         | 1.61 |
|       | OF         | y=2.137x+5.570                                       | 0.541                                     | 0.411~0.706                     | 0.9927                     | 0.7680         | 1.42 |
|       | AI         | y=3.744x+6.007                                       | 0.538                                     | 0.454~0.631                     | 0.9866                     | 1.5795         | 1.41 |
|       | SS         | y=2.938x+6.232                                       | 0.381                                     | 0.313~0.460                     | 0.9952                     | 0.3946         | 1.00 |

**Table S3.** Susceptibility of field populations and a laboratory population of *F. occidentalis* to emamectin benzoate

| Month | Population | Concentration-response regression equation | LC <sub>50</sub><br>(mg·L <sup>-1</sup> ) | 95% CI<br>(mg·L <sup>-1</sup> ) | Correlation coefficient | χ <sup>2</sup> | RR   |
|-------|------------|--------------------------------------------|-------------------------------------------|---------------------------------|-------------------------|----------------|------|
| 4     | FA         | y=2.793x-7.460                             | 7.601                                     | 5.904~9.429                     | 0.9841                  | 1.7291         | 3.98 |
|       | OF         | y=1.925x-5.821                             | 2.668                                     | 1.887~3.706                     | 0.9994                  | 0.0933         | 1.40 |
|       | AI         | y=3.400x-6.184                             | 2.230                                     | 1.891~2.667                     | 0.9959                  | 0.4155         | 1.17 |
|       | SS         | y=3.426x-5.964                             | 1.912                                     | 1.581~2.276                     | 0.9998                  | 0.0210         | 1.00 |
| 5     | FA         | y=1.833x-6.758                             | 9.097                                     | 6.584~12.232                    | 0.9967                  | 0.1895         | 4.90 |
|       | OF         | y=1.384x-5.669                             | 3.403                                     | 2.016~4.614                     | 0.9971                  | 0.2749         | 1.83 |
|       | AI         | y=2.315x-6.152                             | 3.144                                     | 2.205~4.096                     | 0.9907                  | 0.8455         | 1.69 |
|       | SS         | y=3.187x-5.856                             | 1.857                                     | 1.529~2.223                     | 0.9989                  | 0.0982         | 1.00 |
| 6     | FA         | y=3.961x-9.110                             | 10.907                                    | 9.119~12.934                    | 0.9955                  | 0.6313         | 5.01 |
|       | OF         | y=3.094x-6.726                             | 3.614                                     | 2.873~4.318                     | 0.9912                  | 0.7586         | 1.66 |
|       | AI         | y=1.436x-5.759                             | 3.375                                     | 2.227~5.138                     | 0.9951                  | 0.4567         | 1.55 |
|       | SS         | y=2.809x-5.949                             | 2.177                                     | 1.792~2.689                     | 0.9992                  | 0.0624         | 1.00 |
| 7     | FA         | y=1.414x-6.260                             | 7.780                                     | 4.708~11.223                    | 0.9977                  | 0.0778         | 4.48 |
|       | OF         | y=3.094x-7.049                             | 4.596                                     | 3.797~5.502                     | 0.9960                  | 0.3538         | 2.65 |
|       | AI         | y=1.438x-5.731                             | 3.22                                      | 2.122~4.891                     | 0.9830                  | 1.6204         | 1.85 |
|       | SS         | y=2.837x-5.679                             | 1.736                                     | 1.397~2.100                     | 0.9997                  | 0.0219         | 1.00 |
| 8     | FA         | y=2.137x-7.100                             | 9.605                                     | 7.156~12.622                    | 1.0000                  | 0.0025         | 5.47 |
|       | OF         | y=3.366x-7.335                             | 4.938                                     | 4.160~5.861                     | 0.9950                  | 0.5158         | 2.81 |
|       | AI         | y=1.495x-5.833                             | 3.604                                     | 2.359~5.485                     | 0.9962                  | 0.3429         | 2.05 |
|       | SS         | y=3.063x-5.748                             | 1.755                                     | 1.425~2.109                     | 1.0000                  | 0.0001         | 1.00 |
| 9     | FA         | y=2.290x-7.263                             | 9.725                                     | 7.481~12.522                    | 0.9959                  | 0.3313         | 5.38 |
|       | OF         | y=3.661x-7.527                             | 4.900                                     | 4.135~5.772                     | 0.9964                  | 0.3922         | 2.71 |
|       | AI         | y=1.284x-5.750                             | 3.838                                     | 2.402~6.247                     | 0.9984                  | 0.1155         | 2.12 |
|       | SS         | y=3.875x-5.996                             | 1.807                                     | 1.530~2.109                     | 1.0000                  | 0.0002         | 1.00 |
| 10    | FA         | y=2.719x-7.310                             | 7.074                                     | 5.473~8.761                     | 1.0000                  | 0.0001         | 4.03 |
|       | OF         | y=3.898x-7.600                             | 4.645                                     | 3.942~5.426                     | 0.9863                  | 1.7063         | 2.64 |
|       | AI         | y=1.340x-5.498                             | 2.351                                     | 1.508~3.558                     | 0.9848                  | 1.4101         | 1.34 |
|       | SS         | y=3.604x-5.882                             | 1.757                                     | 1.483~2.058                     | 0.9982                  | 0.2009         | 1.00 |
| 11    | FA         | y=2.949x-7.643                             | 7.879                                     | 6.366~9.598                     | 0.9884                  | 1.4840         | 4.05 |
|       | OF         | y=3.664x-7.555                             | 4.981                                     | 4.206~5.872                     | 0.9946                  | 0.8025         | 2.56 |
|       | AI         | y=1.387x-5.618                             | 2.791                                     | 1.841~4.209                     | 0.9918                  | 0.7917         | 1.44 |
|       | SS         | y=3.696x-6.067                             | 1.944                                     | 1.658~2.278                     | 0.9977                  | 0.2754         | 1.00 |

**Table S4.** Susceptibility of field populations and a laboratory population of *F. occidentalis* to chlorfenapyr

| Month | Population | Concentration-<br>response<br>regression<br>equation | LC <sub>50</sub><br>(mg·L <sup>-1</sup> ) | 95% CI<br>(mg·L <sup>-1</sup> ) | Correlation<br>coefficient | χ <sup>2</sup> | RR   |
|-------|------------|------------------------------------------------------|-------------------------------------------|---------------------------------|----------------------------|----------------|------|
| 4     | FA         | y=1.554x-7.276                                       | 29.102                                    | 20.138~44.027                   | 0.9890                     | 0.9293         | 2.69 |
|       | OF         | y=2.383x+6.197                                       | 38.244                                    | 28.663~50.389                   | 0.9901                     | 1.5418         | 3.53 |
|       | AI         | y=1.856x-7.588                                       | 24.820                                    | 18.221~35.509                   | 0.9938                     | 0.3253         | 2.29 |
|       | SS         | y=8.130x-13.410                                      | 10.824                                    | 9.884~11.743                    | 0.9957                     | 0.5744         | 1.00 |
| 5     | FA         | y=2.475x-8.668                                       | 30.336                                    | 23.960~39.414                   | 0.9867                     | 1.1221         | 2.69 |
|       | OF         | y=0.929x-6.395                                       | 31.723                                    | 15.773~56.442                   | 0.9945                     | 0.1935         | 2.82 |
|       | AI         | y=3.801x-10.325                                      | 25.171                                    | 21.148~29.660                   | 0.9974                     | 0.2833         | 2.23 |
|       | SS         | y=5.752x-11.050                                      | 11.264                                    | 10.090~12.450                   | 0.9991                     | 0.0914         | 1.00 |
| 6     | FA         | y=1.551x-7.535                                       | 43.121                                    | 30.333~81.038                   | 0.9877                     | 0.4792         | 4.75 |
|       | OF         | y=2.014x-7.879                                       | 26.881                                    | 19.188~36.231                   | 0.9983                     | 0.1973         | 2.96 |
|       | AI         | y=3.214x-9.548                                       | 26.001                                    | 21.827~31.200                   | 0.9899                     | 0.9637         | 2.87 |
|       | SS         | y=3.405x-8.261                                       | 9.072                                     | 7.608~10.709                    | 0.9982                     | 0.1818         | 1.00 |
| 7     | FA         | y=1.815x-7.683                                       | 30.069                                    | 22.223~43.301                   | 0.9898                     | 0.5229         | 2.55 |
|       | OF         | y=1.589x-7.592                                       | 42.730                                    | 29.415~62.180                   | 0.9915                     | 0.7400         | 3.63 |
|       | AI         | y=3.216x-9.476                                       | 24.638                                    | 20.623~29.449                   | 0.9871                     | 1.2478         | 2.09 |
|       | SS         | y=5.504x-10.897                                      | 11.784                                    | 10.612~13.068                   | 0.9918                     | 0.7917         | 1.00 |
| 8     | FA         | y=1.763x-7.581                                       | 29.073                                    | 20.993~42.360                   | 0.9970                     | 0.1388         | 2.56 |
|       | OF         | y=2.211x-8.588                                       | 41.959                                    | 30.493~56.408                   | 0.9993                     | 0.0933         | 3.70 |
|       | AI         | y=3.531x-9.889                                       | 24.242                                    | 20.547~28.567                   | 0.9923                     | 0.8651         | 2.14 |
|       | SS         | y=5.492x-10.795                                      | 11.354                                    | 10.132~12.602                   | 0.9909                     | 0.8290         | 1.00 |
| 9     | FA         | y=1.797x-7.591                                       | 27.687                                    | 20.289~39.179                   | 1.0000                     | 0.0002         | 2.49 |
|       | OF         | y=1.568x-7.547                                       | 42.123                                    | 28.284~62.012                   | 0.9931                     | 0.5499         | 3.79 |
|       | AI         | y=3.174x-9.458                                       | 25.393                                    | 21.041~30.590                   | 0.9954                     | 0.4008         | 2.29 |
|       | SS         | y=5.276x-10.515                                      | 11.100                                    | 9.837~12.353                    | 0.9918                     | 0.6953         | 1.00 |
| 10    | FA         | y=1.699x-8.123                                       | 68.896                                    | 46.183~179.911                  | 0.9990                     | 0.0350         | 6.39 |
|       | OF         | y=1.960x-8.002                                       | 33.985                                    | 24.977~45.910                   | 0.9888                     | 1.4829         | 3.15 |
|       | AI         | y=3.483x-9.867                                       | 24.951                                    | 20.934~29.601                   | 0.9983                     | 0.1735         | 2.31 |
|       | SS         | y=4.933x-10.094                                      | 10.780                                    | 9.487~12.028                    | 0.9872                     | 1.0290         | 1.00 |
| 11    | FA         | y=1.938x-8.620                                       | 73.810                                    | 55.306~99.697                   | 0.9962                     | 0.3302         | 6.67 |
|       | OF         | y=1.823x-7.683                                       | 29.666                                    | 21.162~40.591                   | 0.9896                     | 1.2179         | 2.68 |
|       | AI         | y=3.463x-9.770                                       | 23.844                                    | 19.746~28.373                   | 0.9951                     | 0.4710         | 2.15 |
|       | SS         | y=5.633x-10.882                                      | 11.070                                    | 9.938~12.224                    | 0.9859                     | 1.4367         | 1.00 |

**Table S5.** Susceptibility of field populations and a laboratory population of *F. occidentalis* to acetamiprid

| Month | Population | Concentration-response regression equation | LC <sub>50</sub><br>(mg·L <sup>-1</sup> ) | 95% CI<br>(mg·L <sup>-1</sup> ) | Correlation coefficient | χ <sup>2</sup> | RR   |
|-------|------------|--------------------------------------------|-------------------------------------------|---------------------------------|-------------------------|----------------|------|
| 4     | FA         | Y=2.644x-11.091                            | 201.165                                   | 151.469~251.806                 | 0.9912                  | 0.8393         | 2.20 |
|       | OF         | Y=2.734x-10.673                            | 118.842                                   | 96.030~151.278                  | 0.9975                  | 0.1550         | 1.30 |
|       | AI         | Y=2.686x-10.375                            | 100.193                                   | 81.916~125.394                  | 0.9999                  | 0.0099         | 1.10 |
|       | SS         | Y=3.265x-11.402                            | 91.310                                    | 75.575~110.389                  | 0.9956                  | 0.3787         | 1.00 |
| 5     | FA         | Y=2.038x-9.919                             | 259.261                                   | 193.087~338.285                 | 0.9931                  | 0.4840         | 3.15 |
|       | OF         | Y=2.328x-10.043                            | 146.813                                   | 11.077~193.490                  | 0.9990                  | 0.0510         | 1.78 |
|       | AI         | Y=2.465x-9.965                             | 103.419                                   | 81.760~134.896                  | 0.9891                  | 0.5559         | 1.26 |
|       | SS         | Y=2.880x-10.517                            | 82.331                                    | 66.883~100.511                  | 0.9996                  | 0.0281         | 1.00 |
| 6     | FA         | Y=1.851x-9.312                             | 213.627                                   | 144.053~285.515                 | 0.9998                  | 0.0113         | 2.71 |
|       | OF         | Y=3.897x-12.947                            | 109.466                                   | 92.498~127.552                  | 0.9982                  | 0.2092         | 1.39 |
|       | AI         | Y=3.702x-12.516                            | 107.165                                   | 91.741~126.207                  | 0.9914                  | 1.0137         | 1.36 |
|       | SS         | Y=3.230x-11.125                            | 78.782                                    | 65.688~93.785                   | 0.9980                  | 0.1895         | 1.00 |
| 7     | FA         | Y=1.565x-8.888                             | 304.528                                   | 212.293~439.717                 | 0.9997                  | 0.0141         | 4.21 |
|       | OF         | Y=2.921x-10.911                            | 105.554                                   | 84.239~127.568                  | 0.9892                  | 0.7983         | 1.46 |
|       | AI         | Y=3.070x-11.251                            | 108.638                                   | 90.229~130.762                  | 0.9945                  | 0.4849         | 1.50 |
|       | SS         | Y=3.461x-11.436                            | 72.343                                    | 60.549~85.120                   | 0.9966                  | 0.3634         | 1.00 |
| 8     | FA         | Y=2.502x-11.233                            | 309.743                                   | 240.452~395.571                 | 0.9857                  | 0.8257         | 4.00 |
|       | OF         | Y=2.717x-10.852                            | 142.615                                   | 114.868~180.515                 | 0.9999                  | 0.0045         | 1.84 |
|       | AI         | Y=3.537x-12.148                            | 105.001                                   | 88.914~123.597                  | 0.9955                  | 0.4995         | 1.35 |
|       | SS         | Y=3.236x-11.114                            | 77.495                                    | 64.522~92.145                   | 0.9995                  | 0.0431         | 1.00 |
| 9     | FA         | Y=2.607x-11.541                            | 323.033                                   | 252.532~408.235                 | 0.9971                  | 0.2733         | 4.08 |
|       | OF         | Y=2.307x-9.894                             | 132.133                                   | 102.057~172.438                 | 0.9991                  | 0.0410         | 1.67 |
|       | AI         | Y=3.328x-11.740                            | 105.959                                   | 88.125~126.275                  | 0.9955                  | 0.4995         | 1.34 |
|       | SS         | Y=2.894x-10.493                            | 79.146                                    | 64.098~96.300                   | 0.9966                  | 0.2559         | 1.00 |
| 10    | FA         | Y=2.120x-10.712                            | 494.507                                   | 360.589~653.193                 | 0.9889                  | 1.0394         | 6.80 |
|       | OF         | Y=3.627x-12.394                            | 109.323                                   | 92.410~128.007                  | 0.9853                  | 1.7460         | 1.50 |
|       | AI         | Y=3.565x-12.149                            | 101.276                                   | 85.698~118.977                  | 0.9892                  | 1.2404         | 1.39 |
|       | SS         | Y=3.606x-11.714                            | 72.740                                    | 60.791~85.555                   | 0.9871                  | 1.4260         | 1.00 |
| 11    | FA         | Y=1.937x-10.347                            | 576.220                                   | 427.764~770.612                 | 0.9986                  | 0.1187         | 7.49 |
|       | OF         | Y=3.134x-11.383                            | 108.838                                   | 89.604~129.788                  | 0.9941                  | 0.5379         | 1.41 |
|       | AI         | Y=3.238x-12.514                            | 102.736                                   | 85.757~122.318                  | 0.9840                  | 1.5911         | 1.34 |
|       | SS         | Y=2.956x-10.576                            | 76.938                                    | 63.030~92.757                   | 0.9887                  | 0.9519         | 1.00 |

**Table S6.** Susceptibility of field populations and a laboratory population of *F. occidentalis* to imidacloprid

| Month | Population | Concentration-<br>response<br>regression<br>equation | LC <sub>50</sub><br>(mg·L <sup>-1</sup> ) | 95% CI<br>(mg·L <sup>-1</sup> ) | Correlation<br>coefficient | χ <sup>2</sup> | RR    |
|-------|------------|------------------------------------------------------|-------------------------------------------|---------------------------------|----------------------------|----------------|-------|
| 4     | FA         | Y=1.610x-10.820                                      | 4109.092                                  | 2889.596~6020.722               | 0.9975                     | 0.1076         | 3.84  |
|       | OF         | Y=1.196x-9.042                                       | 2391.667                                  | 1389.531~3811.654               | 0.9967                     | 0.1135         | 2.24  |
|       | AI         | Y=2.405x-12.425                                      | 1223.555                                  | 912.042~1521.568                | 0.9842                     | 0.9163         | 1.14  |
|       | SS         | Y=3.668x-11.111                                      | 1069.082                                  | 888.967~1259.980                | 0.9994                     | 0.0667         | 1.00  |
| 5     | FA         | Y=1.527x-10.547                                      | 4294.344                                  | 2882.881~6691.793               | 0.9906                     | 0.3217         | 4.20  |
|       | OF         | Y=2.034x-11.914                                      | 2503.651                                  | 1881.051~3306.946               | 0.9954                     | 0.4391         | 2.45  |
|       | AI         | Y=2.900x-13.994                                      | 1263.692                                  | 996.567~1529.022                | 0.9801                     | 1.5717         | 1.24  |
|       | SS         | Y=3.622x-10.902                                      | 1022.450                                  | 853.732~1201.494                | 0.9913                     | 0.9517         | 1.00  |
| 6     | FA         | Y=2.615x-14.384                                      | 3874.017                                  | 3032.665~4901.150               | 0.9941                     | 0.5542         | 3.79  |
|       | OF         | Y=1.744x-10.526                                      | 1472.744                                  | 926.588~2029.198                | 0.9984                     | 0.1056         | 1.44  |
|       | AI         | Y=3.446x-15.842                                      | 1399.948                                  | 1173.053~1648.804               | 0.9936                     | 0.6834         | 1.37  |
|       | SS         | Y=4.053x-12.197                                      | 1021.193                                  | 874.879~1181.125                | 0.9914                     | 1.1473         | 1.00  |
| 7     | FA         | Y=1.982x-12.177                                      | 4177.689                                  | 3135.541~5667.350               | 0.9990                     | 0.0594         | 4.11  |
|       | OF         | Y=1.870x-11.151                                      | 1943.866                                  | 1353.767~2614.157               | 0.9960                     | 0.2999         | 1.91  |
|       | AI         | Y=3.525x-11.012                                      | 1329.731                                  | 1112.940~1560.672               | 0.9904                     | 1.0589         | 1.31  |
|       | SS         | Y=3.666x-11.025                                      | 1017.653                                  | 858.793~1189.249                | 0.9933                     | 0.7828         | 1.00  |
| 8     | FA         | Y=1.222x-9.463                                       | 4475.975                                  | 2777.122~8299.559               | 0.9999                     | 0.0020         | 3.96  |
|       | OF         | Y=1.762x-10.811                                      | 1984.933                                  | 1334.173~2731.381               | 0.9860                     | 0.9720         | 1.75  |
|       | AI         | Y=3.812x-11.833                                      | 1271.215                                  | 1072.609~1478.773               | 0.9927                     | 0.8645         | 1.12  |
|       | SS         | Y=3.707x-11.320                                      | 1131.332                                  | 962.762~1322.758                | 0.9999                     | 0.0065         | 1.00  |
| 9     | FA         | Y=2.895x-15.636                                      | 4718.614                                  | 3806.433~5851.487               | 0.9996                     | 0.0378         | 4.19  |
|       | OF         | Y=2.354x-12.858                                      | 2181.227                                  | 1631.093~2821.897               | 0.9923                     | 0.8370         | 1.94  |
|       | AI         | Y=3.461x-10.866                                      | 1377.955                                  | 1153.305~1621.329               | 0.9966                     | 0.3634         | 1.22  |
|       | SS         | Y=3.707x-11.320                                      | 1125.541                                  | 958.950~1316.240                | 0.9927                     | 0.8944         | 1.00  |
| 10    | FA         | Y=1.347x-10.518                                      | 12481.257                                 | 7555.979~89896.753              | 0.9603                     | 0.8979         | 11.67 |
|       | OF         | Y=2.054x-11.743                                      | 1916.715                                  | 1433.457~2517.242               | 0.9927                     | 0.9032         | 1.79  |
|       | AI         | Y=3.465x-10.721                                      | 1241.942                                  | 1026.329~1460.436               | 0.9976                     | 0.2439         | 1.16  |
|       | SS         | Y=3.776x-11.440                                      | 1069.675                                  | 910.629~1247.215                | 0.9891                     | 1.3620         | 1.00  |
| 11    | FA         | Y=2.436x-14.846                                      | 11020.071                                 | 8827.977~14091.660              | 0.9867                     | 0.7902         | 10.19 |
|       | OF         | Y=2.394x-12.810                                      | 1830.639                                  | 1416.837~2331.562               | 0.9927                     | 0.9032         | 1.69  |
|       | AI         | Y=3.623x-11.217                                      | 1248.090                                  | 1032.429~1466.032               | 0.9878                     | 1.3131         | 1.15  |
|       | SS         | Y=3.355x-10.178                                      | 1081.002                                  | 886.868~1289.681                | 0.9837                     | 1.5416         | 1.00  |
